# Supplementary material
Source: PubMed Central journal article supplement (PMC2929268)

# A Solanesol-derived Scaffold for Multimerization of Bioactive Peptides

Ramesh Alleti,<sup>†</sup> Venkataramanarao Rao,<sup>†</sup> Liping Xu,<sup>‡</sup> Robert J. Gillies,<sup>‡</sup> and Eugene A. Mash\*,<sup>†</sup>

<sup>†</sup>Department of Chemistry and Biochemistry, University of Arizona, Tucson, Arizona 85721-0041

<sup>‡</sup>H. Lee Moffitt Cancer Center & Research Institute, Tampa, Florida 33612

## SUPPORTING INFORMATION

Table of Contents:

|          |                                                       |
|----------|-------------------------------------------------------|
| Page S2  | General Experimental                                  |
| Page S3  | List of Non-standard Abbreviations                    |
| Page S4  | <b>Figure S1.</b> <sup>1</sup> H NMR of <b>5</b> .    |
| Page S5  | <b>Figure S2.</b> <sup>13</sup> C NMR of <b>5</b> .   |
| Page S6  | <b>Figure S3.</b> <sup>1</sup> H NMR of <b>6</b> .    |
| Page S7  | <b>Figure S4.</b> <sup>13</sup> C NMR of <b>6</b> .   |
| Page S8  | <b>Figure S5.</b> <sup>1</sup> H NMR of <b>10</b> .   |
| Page S9  | <b>Figure S6.</b> <sup>13</sup> C NMR of <b>10</b> .  |
| Page S10 | <b>Figure S7.</b> <sup>1</sup> H NMR of <b>11</b> .   |
| Page S11 | <b>Figure S8.</b> <sup>13</sup> C NMR of <b>11</b> .  |
| Page S12 | <b>Figure S9.</b> <sup>1</sup> H NMR of <b>12</b> .   |
| Page S13 | <b>Figure S10.</b> <sup>13</sup> C NMR of <b>12</b> . |
| Page S14 | <b>Figure S11.</b> APT of <b>7</b> .                  |
| Page S15 | <b>Figure S12.</b> MALDI-TOF of <b>15</b> .           |
| Page S16 | <b>Figure S13.</b> MALDI-TOF of <b>16a</b> .          |
| Page S17 | <b>Figure S14.</b> MALDI-TOF of <b>16b</b> .          |
| Page S18 | <b>Figure S15.</b> MALDI-TOF of <b>16c</b> .          |
| Page S19 | <b>Figure S16.</b> MALDI-TOF of <b>16d</b> .          |
| Page S20 | <b>Figure S17.</b> MALDI-TOF of <b>16e</b> .          |
| Page S21 | UV Studies                                            |

## General Experimental

Solanesol (**3**) and solanesyl bromide (**4**) were purchased from NetChem, New Brunswick, NJ. Serine amide hydrochloride was purchased from Senn Chemicals USA. Diethyl ether (ether), tetrahydrofuran (THF), and dichloromethane (DCM) were dried by passage through columns of activated alumina. For moisture sensitive reactions, glassware was flame-dried under argon. Analytical thin-layer chromatography (TLC) was carried out on pre-coated silica gel 60 F-254 plates with visualization by UV exposure, by exposure to I<sub>2</sub> vapor, or by staining with 10% phosphomolybdic acid solution in EtOH. Flash column chromatography was accomplished using silica gel 60 (4.0–63 μm). Melting points are uncorrected. <sup>1</sup>H NMR and <sup>13</sup>C NMR spectra were recorded at 300 MHz or 500 MHz for <sup>1</sup>H NMR and at 75 MHz or 125 MHz for <sup>13</sup>C NMR. Chemical shifts (δ) are expressed in ppm and are internally referenced (7.24 ppm for CDCl<sub>3</sub> and 3.31 ppm for CD<sub>3</sub>OD for <sup>1</sup>H NMR and 77.0 ppm for CDCl<sub>3</sub> and 49.15 ppm for CD<sub>3</sub>OD for <sup>13</sup>C NMR). Fast-atom bombardment (FAB) mass spectra were measured with *m*-nitrobenzyl alcohol (NBA) or 1% trifluoroacetic acid in a matrix of 50% of glycerol, 25% of thioglycerol, and 25% of NBA (MIX). Electrospray ionization (ESI) was also used to ionize some of the samples. The samples were dissolved in 1:1 methanol:water at a concentration of ca 50 μM. Standard ESI conditions were applied to detect positively charged ions. Analytical HPLC was performed on a 4.6 × 75 mm Waters Symmetry® C<sub>18</sub> column and preparative HPLC was performed on a 19 × 256 mm Waters X-Bridge Preparative C<sub>18</sub> column. The mobile phase was 10-90% acetonitrile and water containing 1% TFA within 50 min, the flow rates were 1 mL/min and 15 mL/min for analytical and preparative runs, respectively. The dual UV detector system operated at 230 and 280 nm. ArgoGel™ Rink NH-Fmoc resin (0.68 mmol/g) was purchased from Novabiochem.

## Non-standard Abbreviations:

APT, attached proton test

BSA, bovine serum albumin

Cl-HOBt, 6-chloro-1-hydroxybenzotriazole

CuAAC, copper(I)-catalyzed azide-alkyne cycloaddition

DIC, diisopropyl carbodiimide

DIEA, diisopropylethylamine

DMEM, Dulbecco's Modified Eagle Medium

DTPA, diethylenetriaminepentaacetic acid

FBS, fetal bovine serum

HBTU, 2-(1*H*-benzotriazol-1-yl)-1,1,3,3-tetramethyluronium hexafluorophosphate

hMC4R, human melanocortin 4 receptor

HOBt, 1-hydroxybenzotriazole

MSH(4), His-DPhe-Arg-Trp

NDP- $\alpha$ -MSH, Ser-Tyr-Ser-Nle-Glu-His-DPhe-Arg-Trp-Gly-Lys-Pro-Val

Pbf, 2,2,4,6,7-pentamethyldihydrobenzofuran-5-ylsulfonyl

PEGO, 19-amino-5-oxo-3,10,13,16-tetraoxa-6-azanonadecan-1-oic acid

PVA, poly(vinyl alcohol)

TBTA, tris[(1-benzyl-1*H*-1,2,3-triazol-4-yl)methyl]amine

Tris-HCl, tris(hydroxymethyl)amino methane hydrochloride

TRF, time-resolved fluorescence



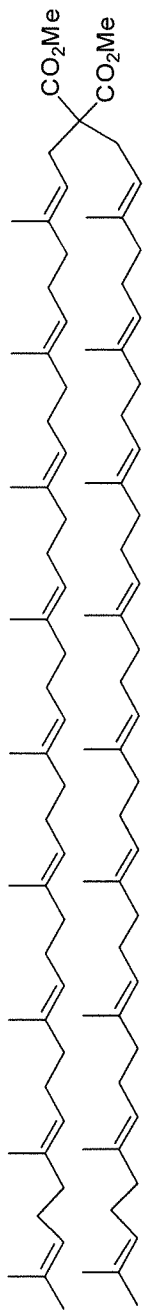

5

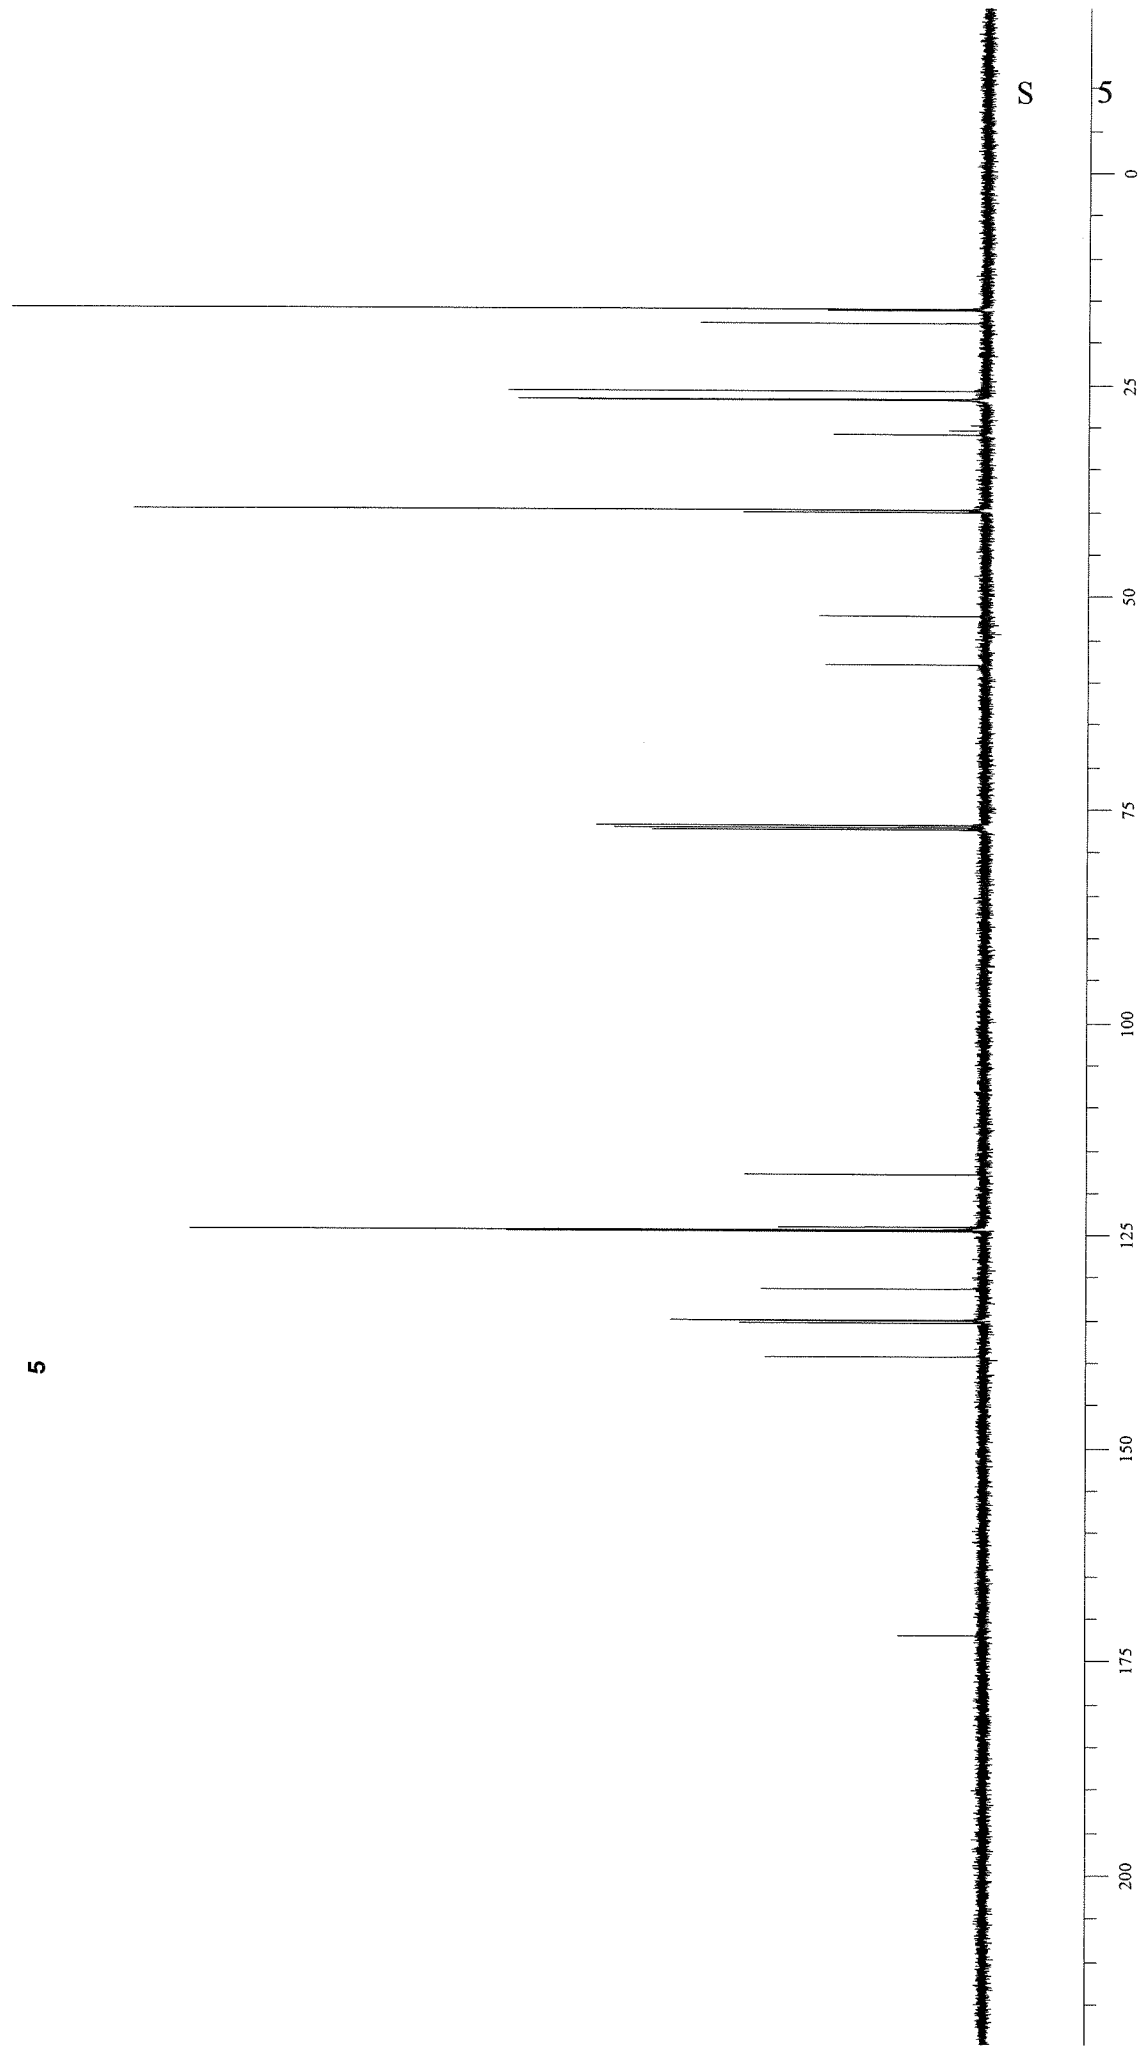

<sup>13</sup>C-NMR of Compound 5

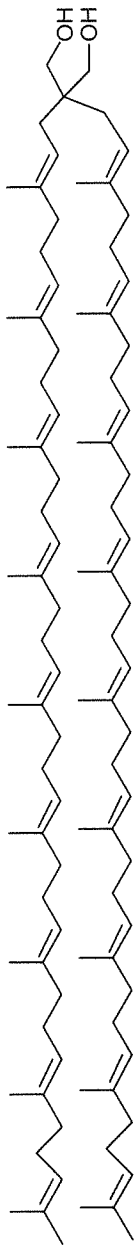

6

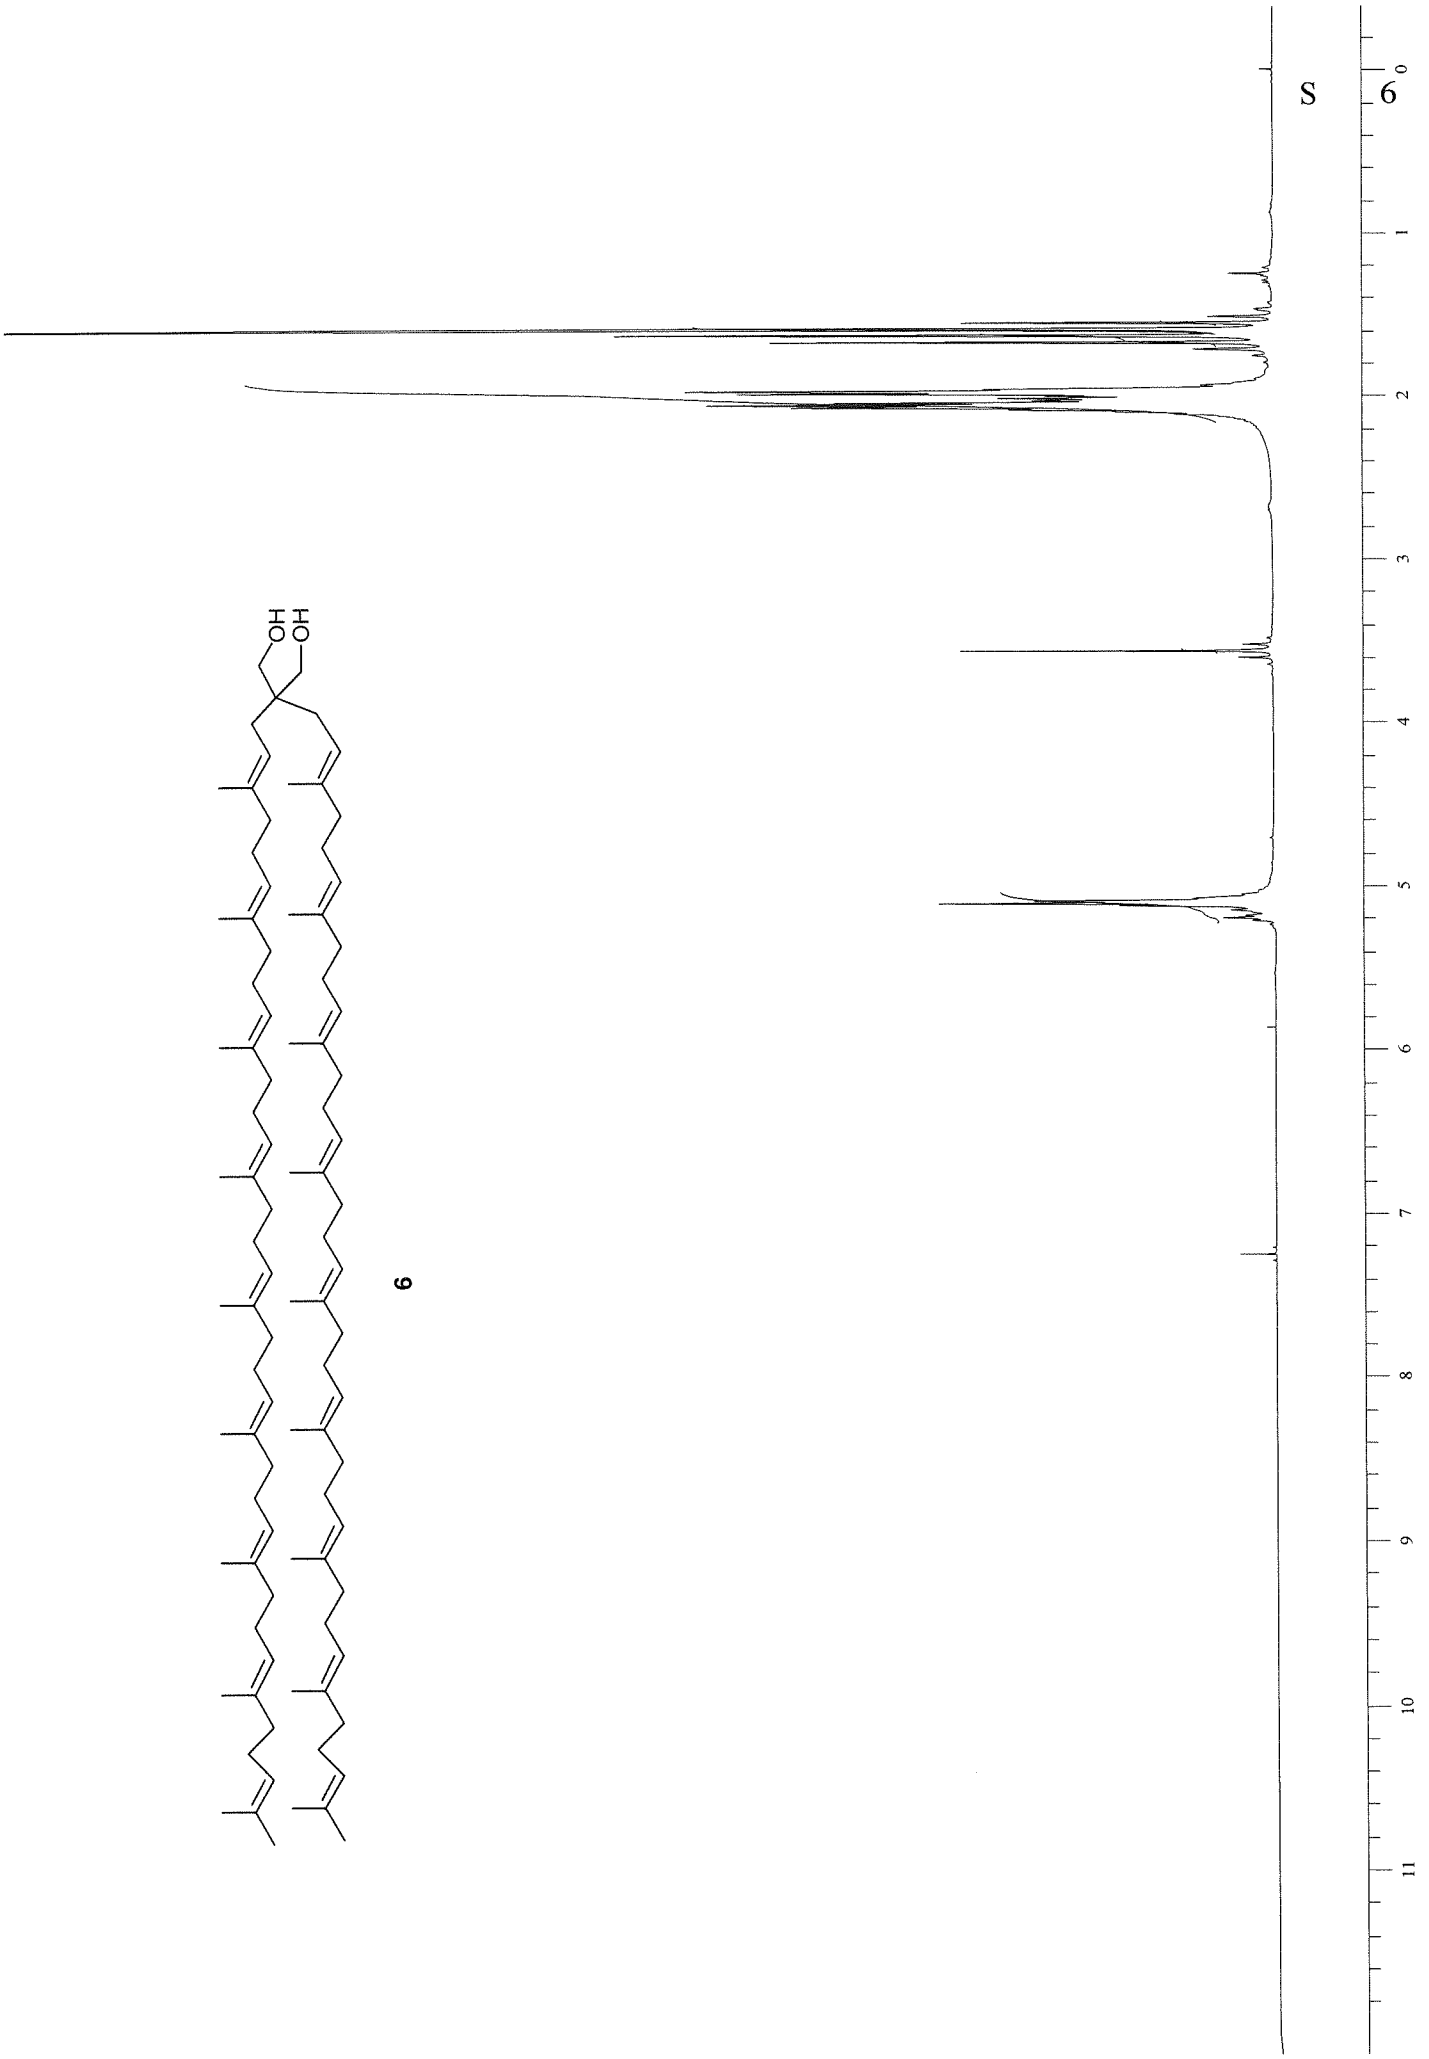

<sup>1</sup>H-NMR of Compound 6



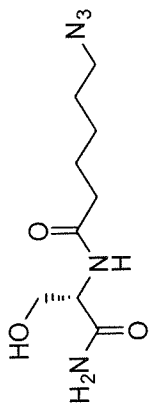

10

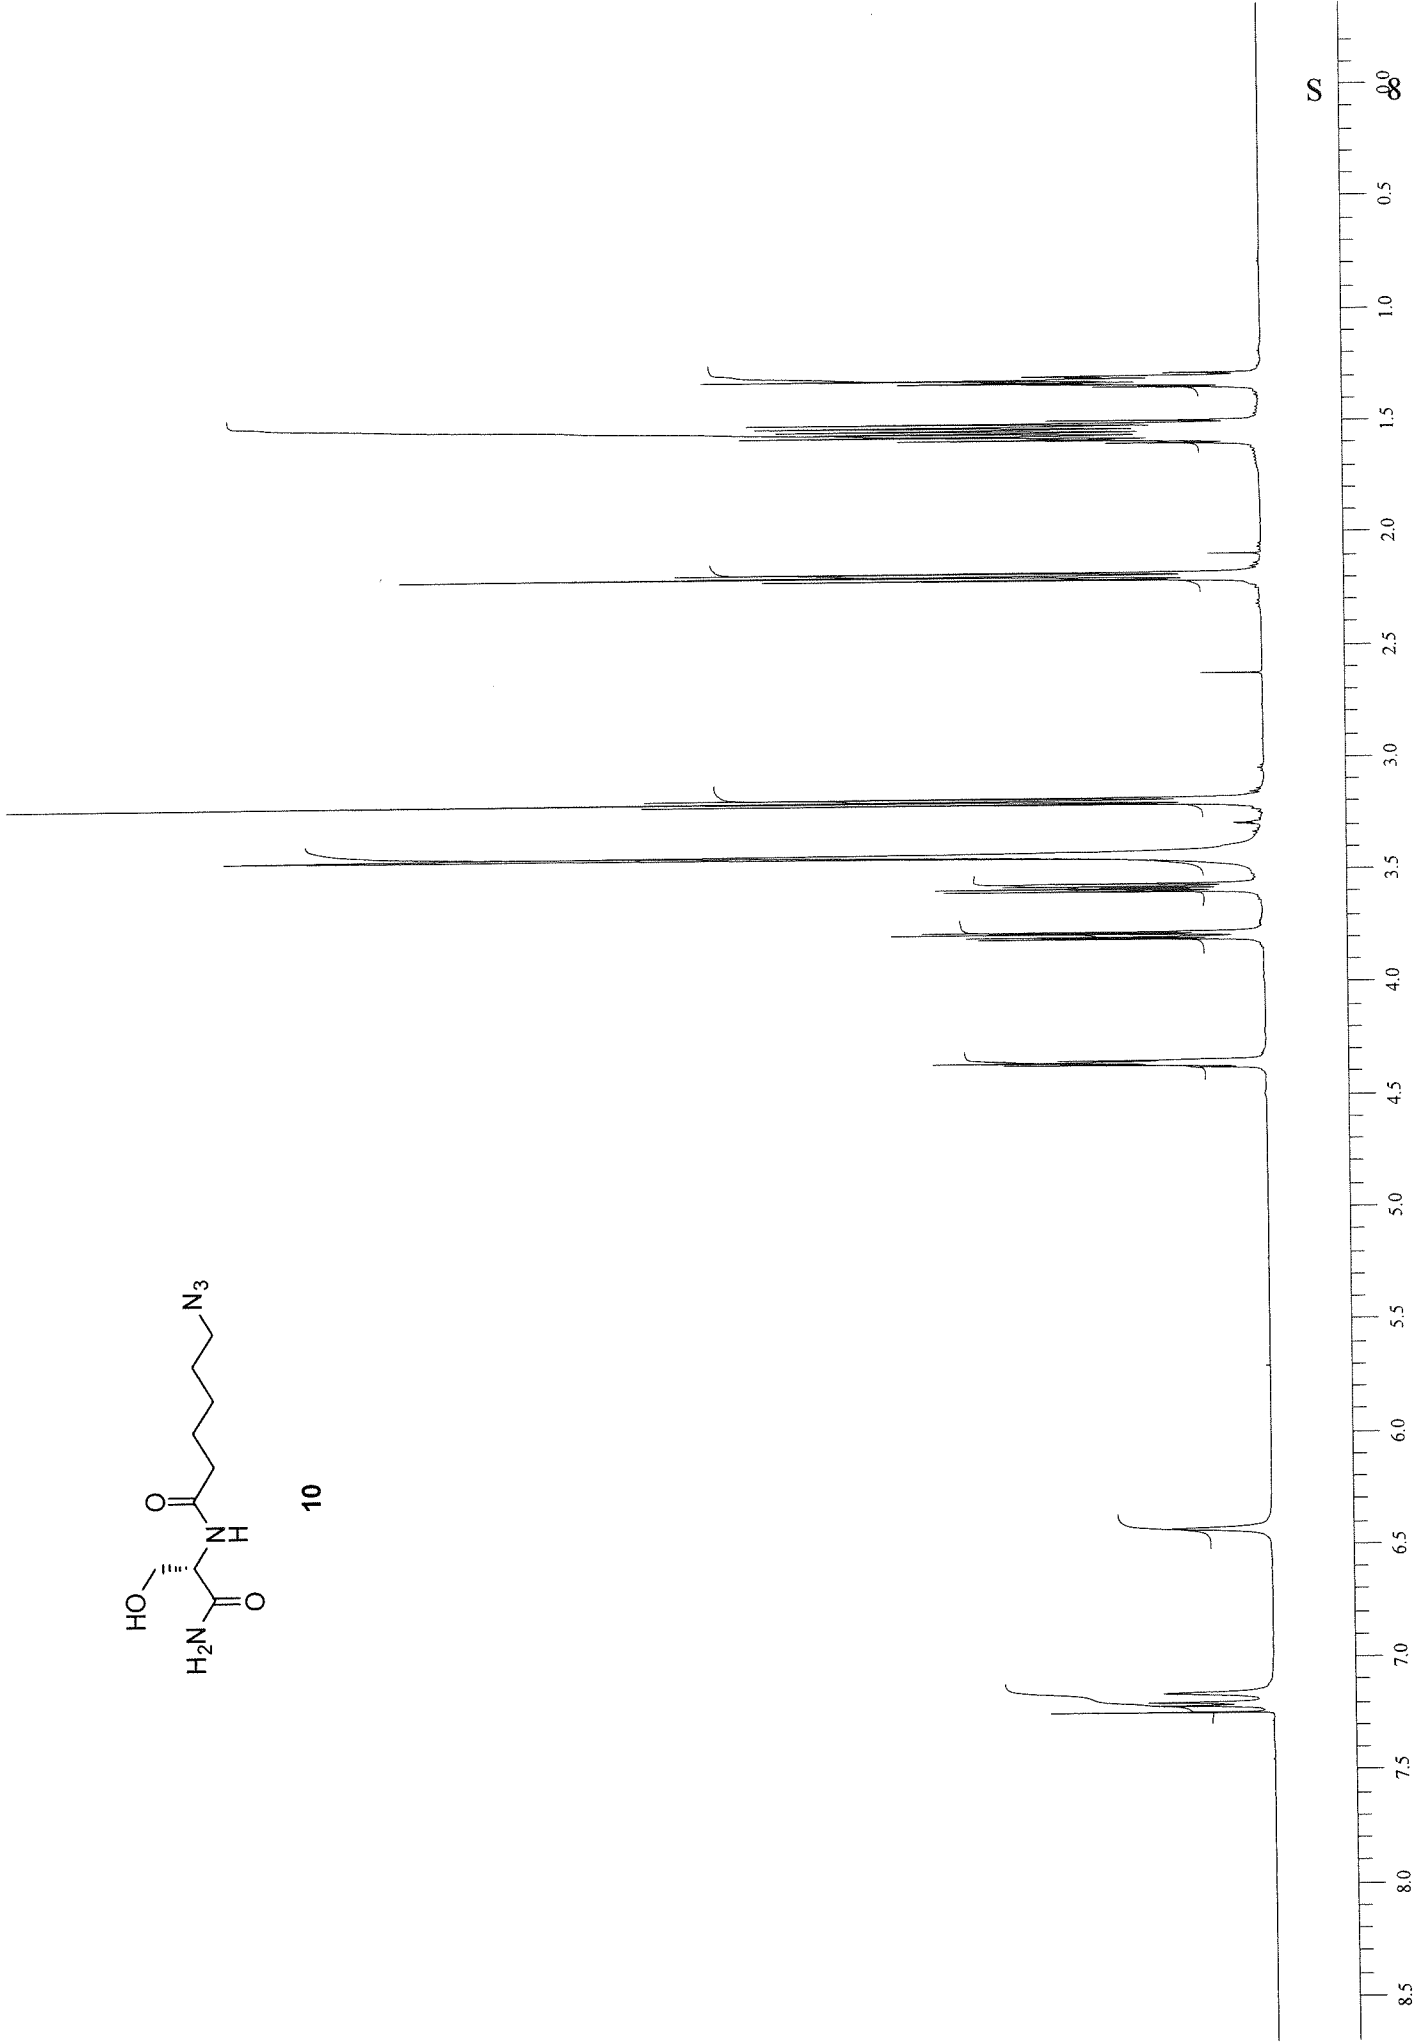

<sup>1</sup>H-NMR of Compound 10



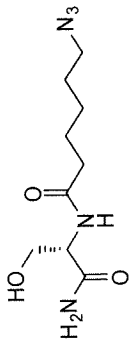

10

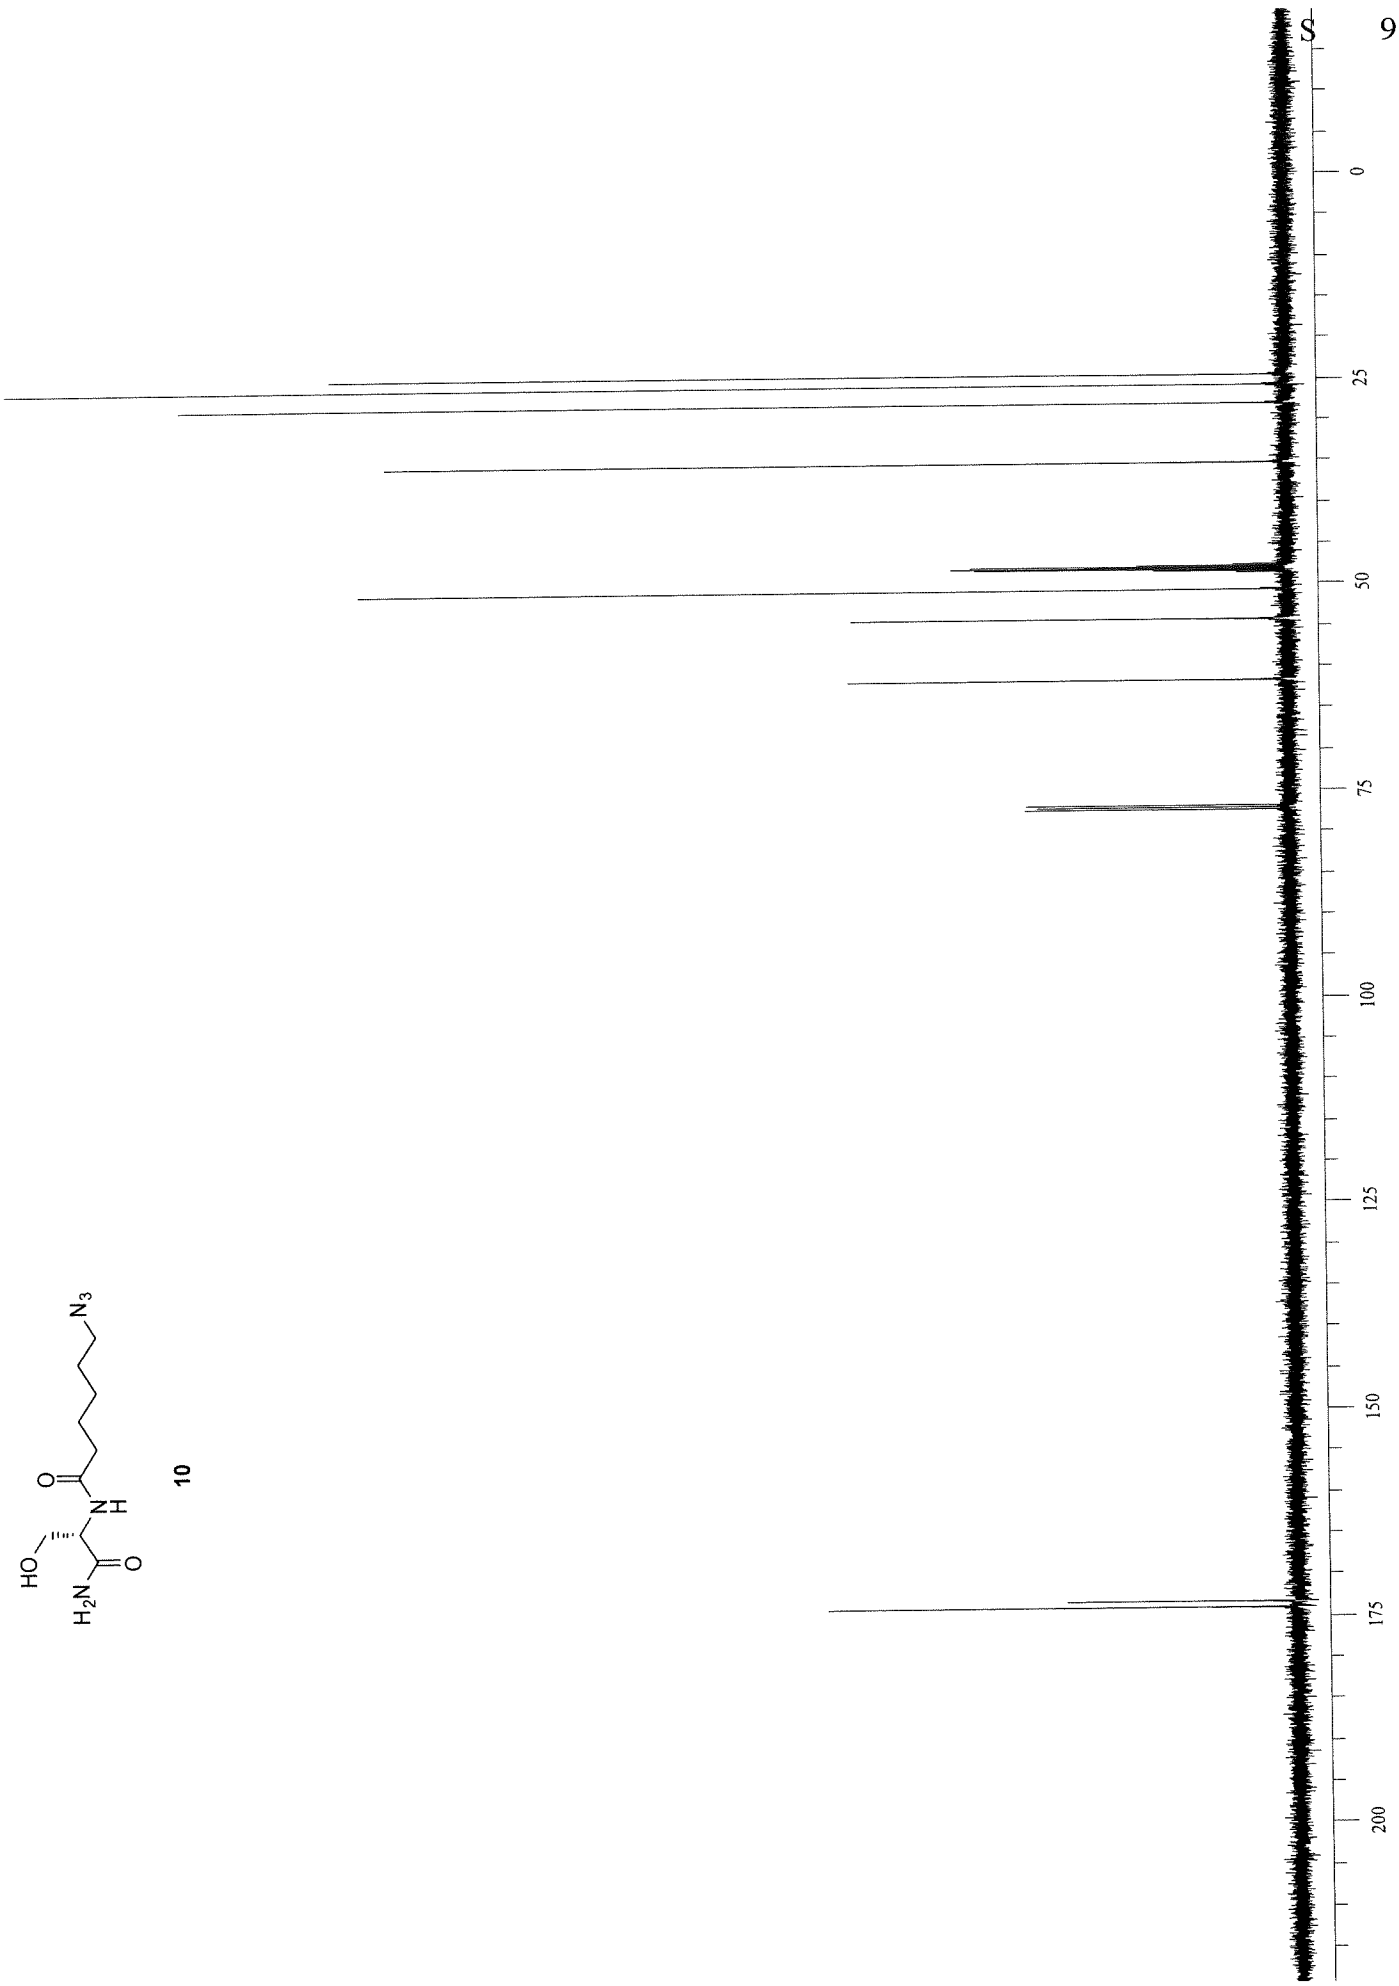

<sup>13</sup>C-NMR of Compound 10

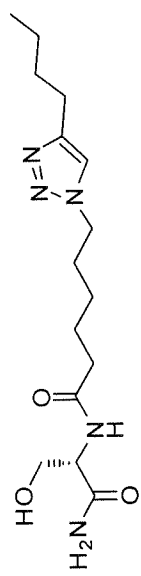

11

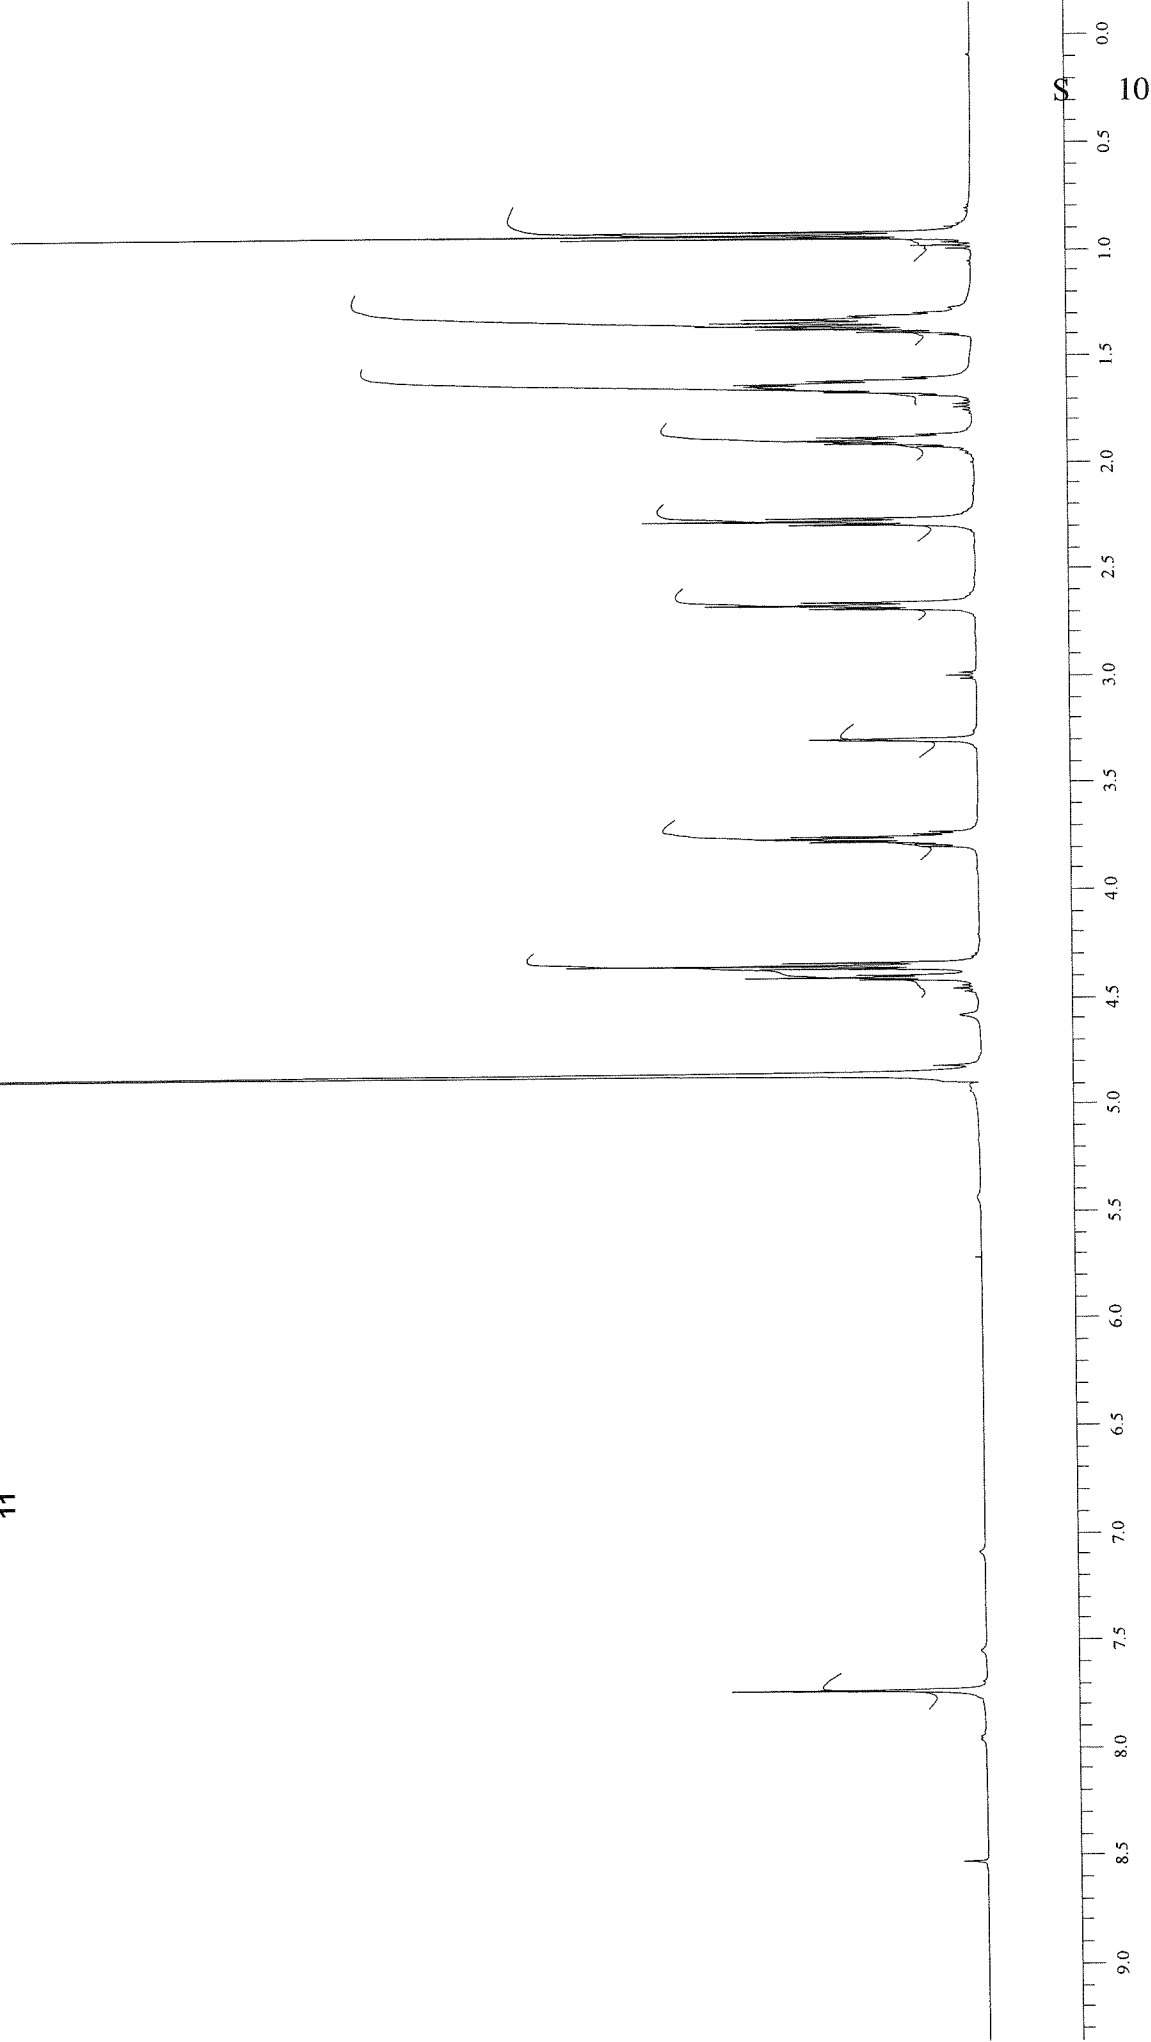

1H-NMR of Compound 11

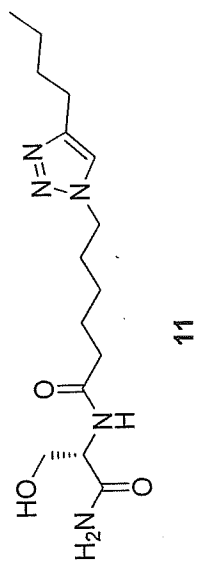

11

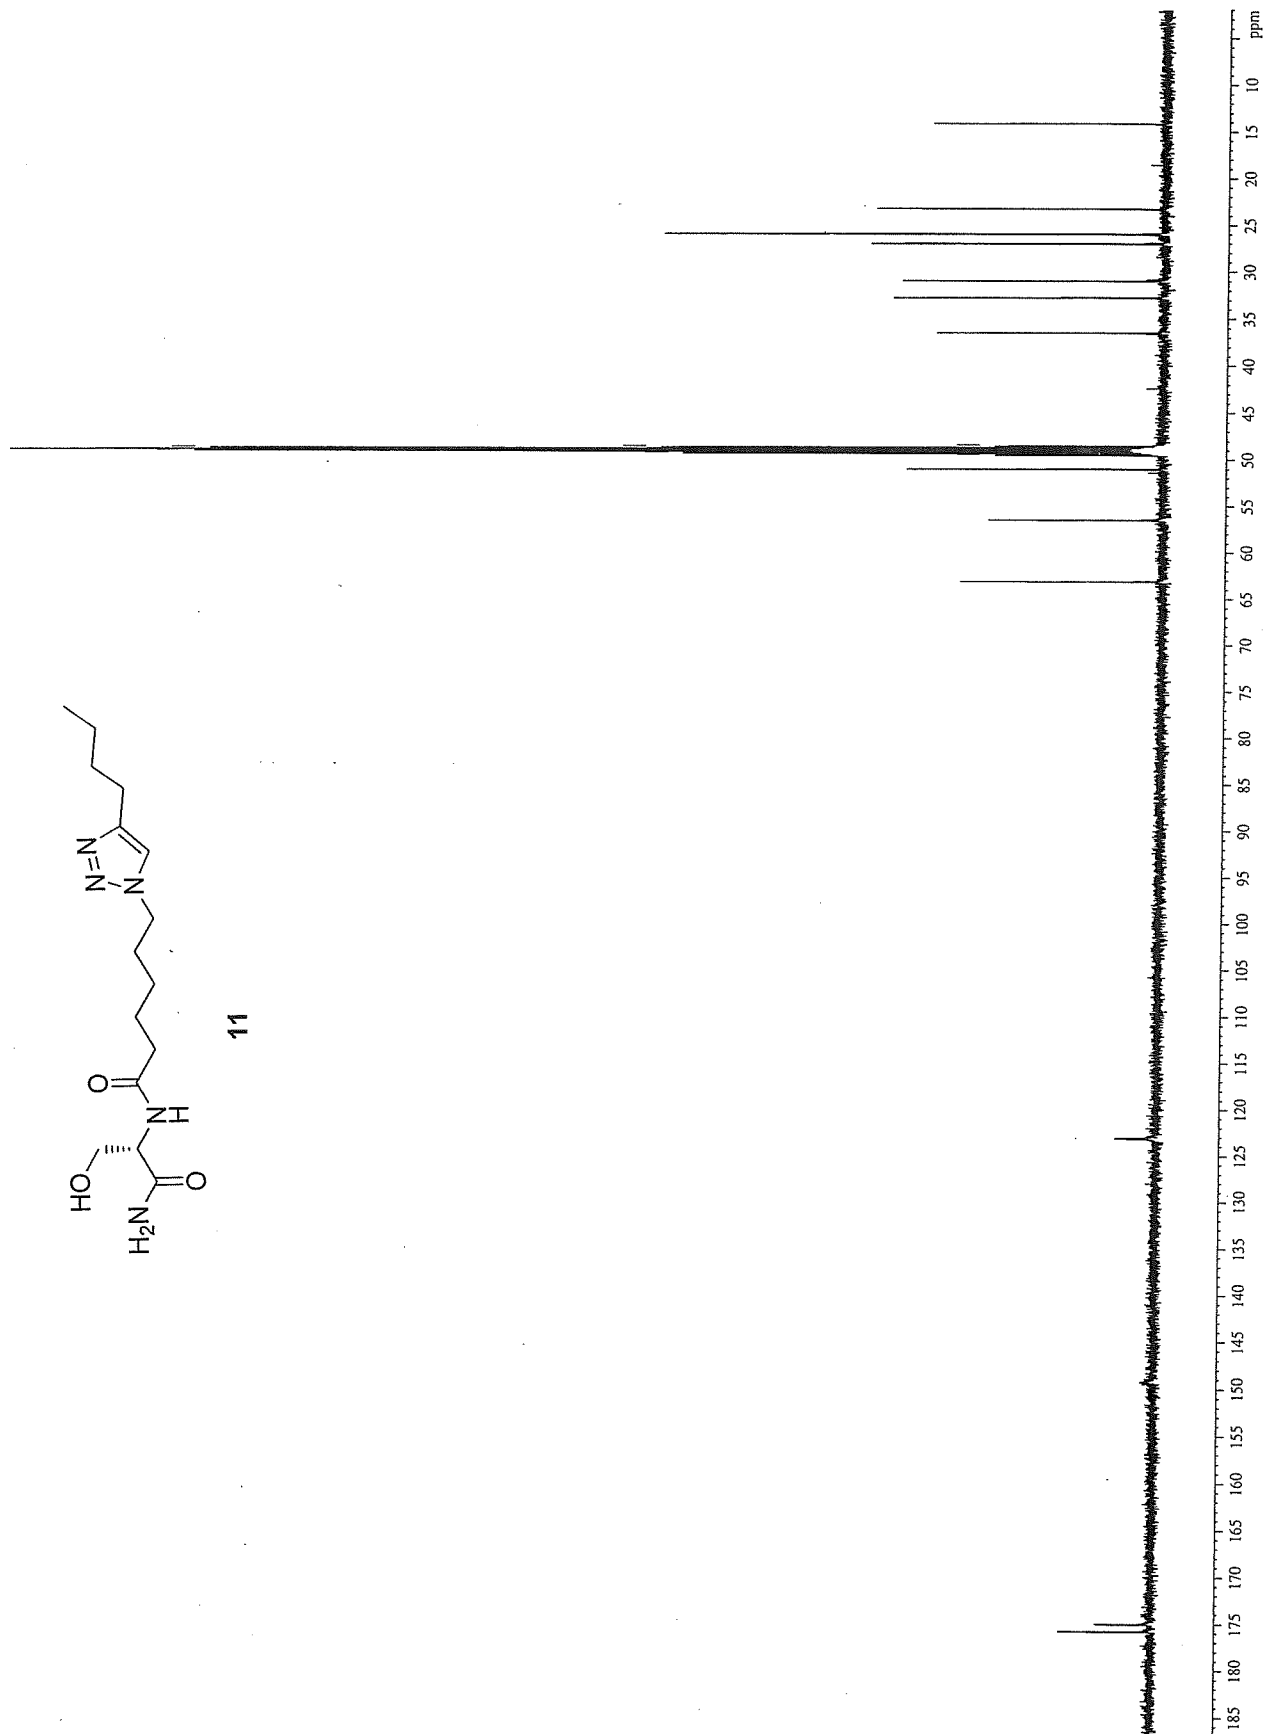<sup>13</sup>C-NMR of Compound 11

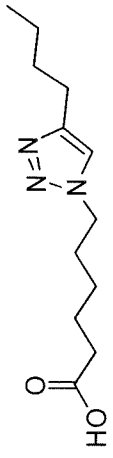

12

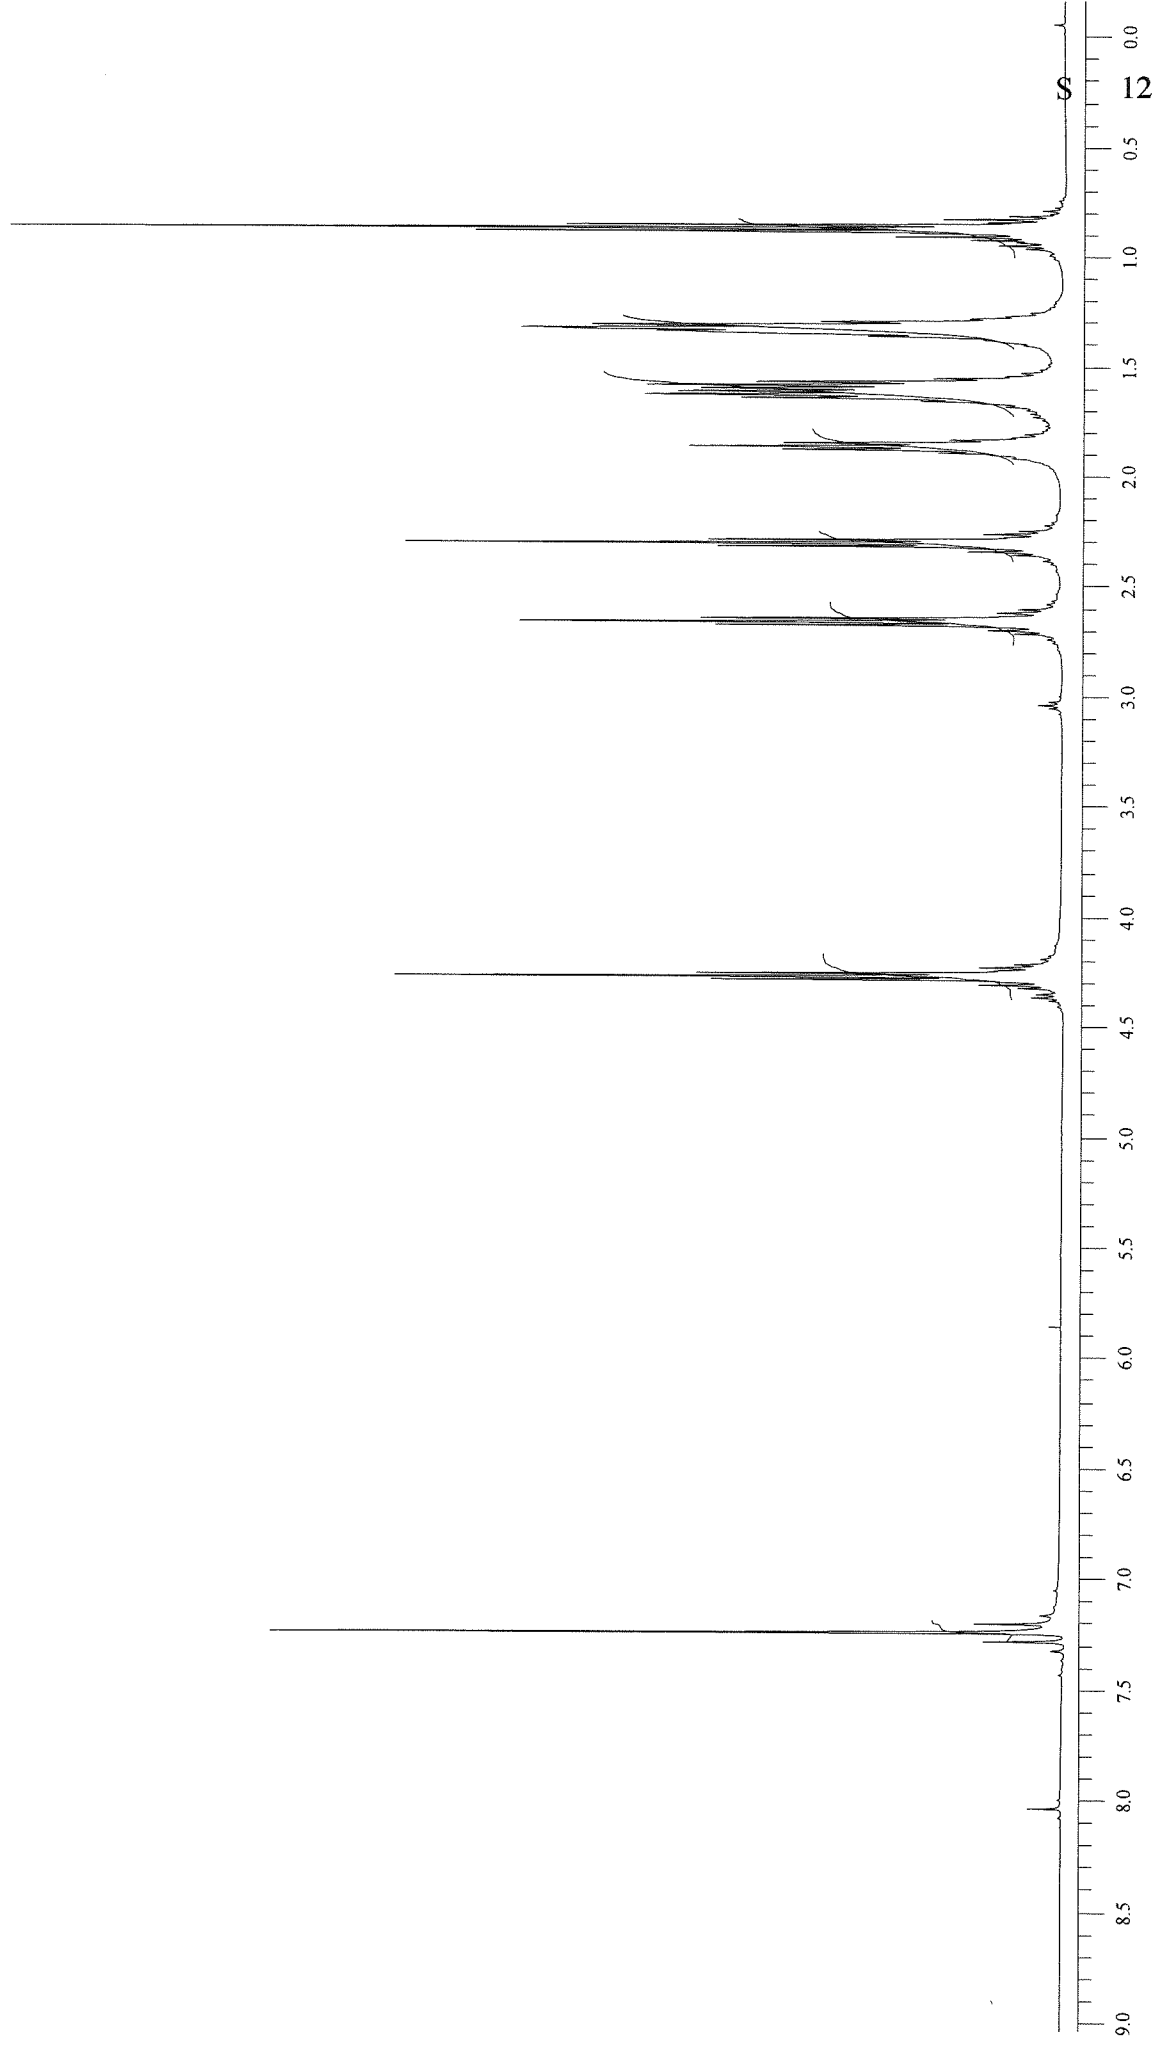

<sup>1</sup>H-NMR of Compound 12

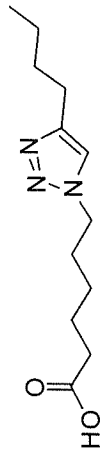

12

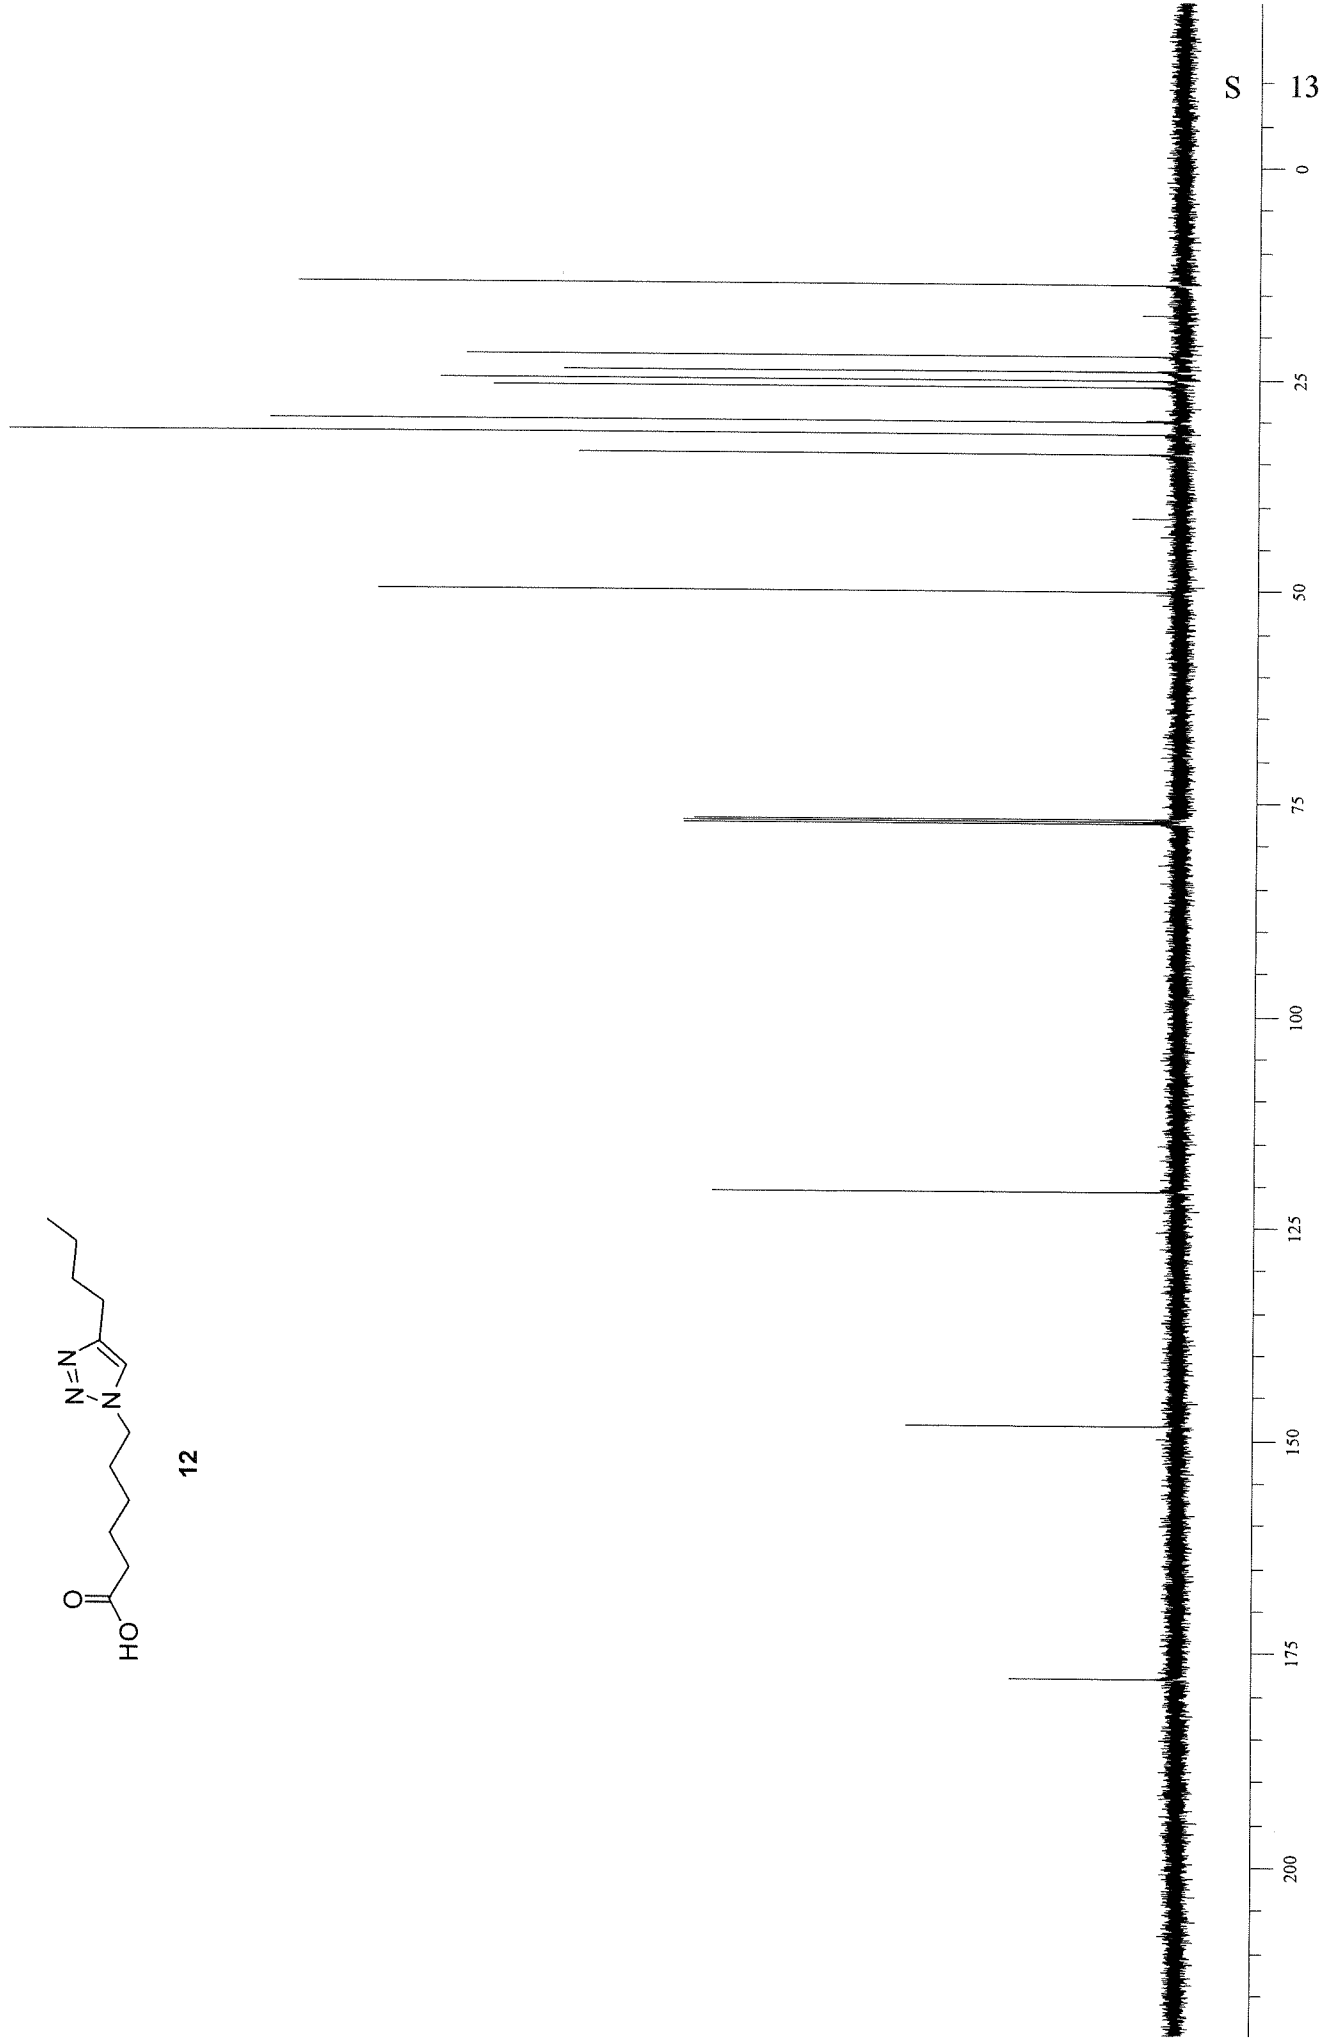

13C-NMR of Compound 12

Figure S11. APT of 7.

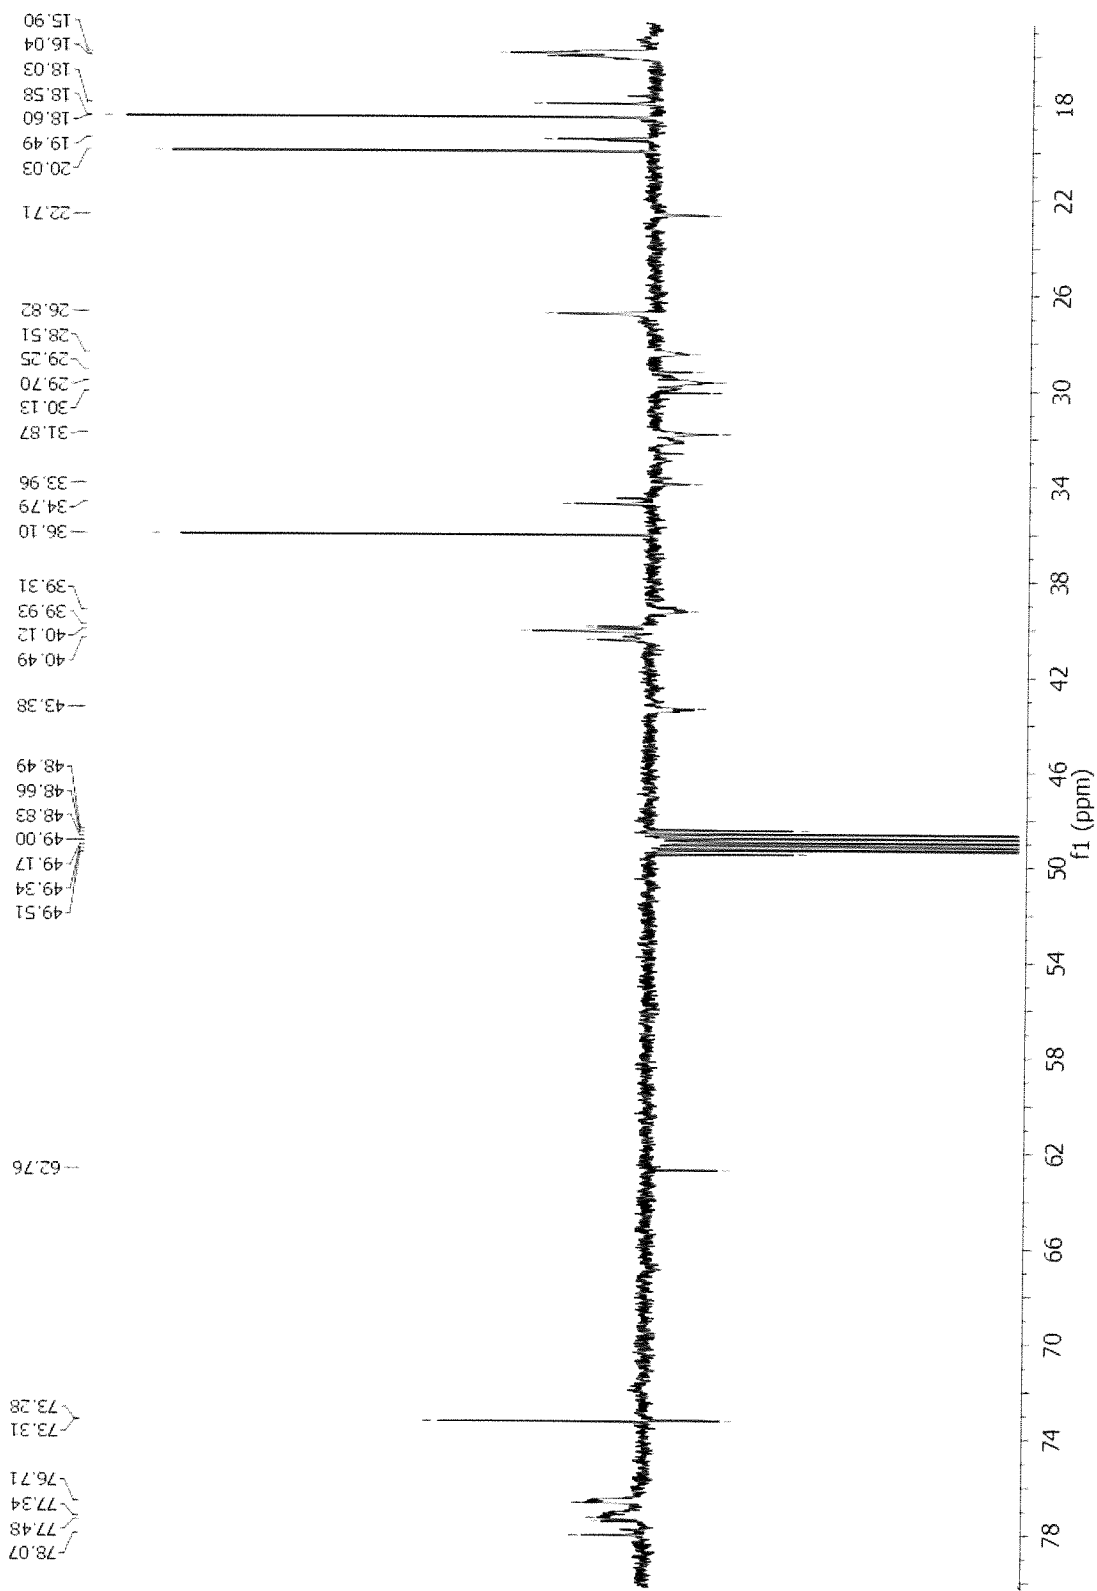

Figure S12. MALDI-TOF of 15.

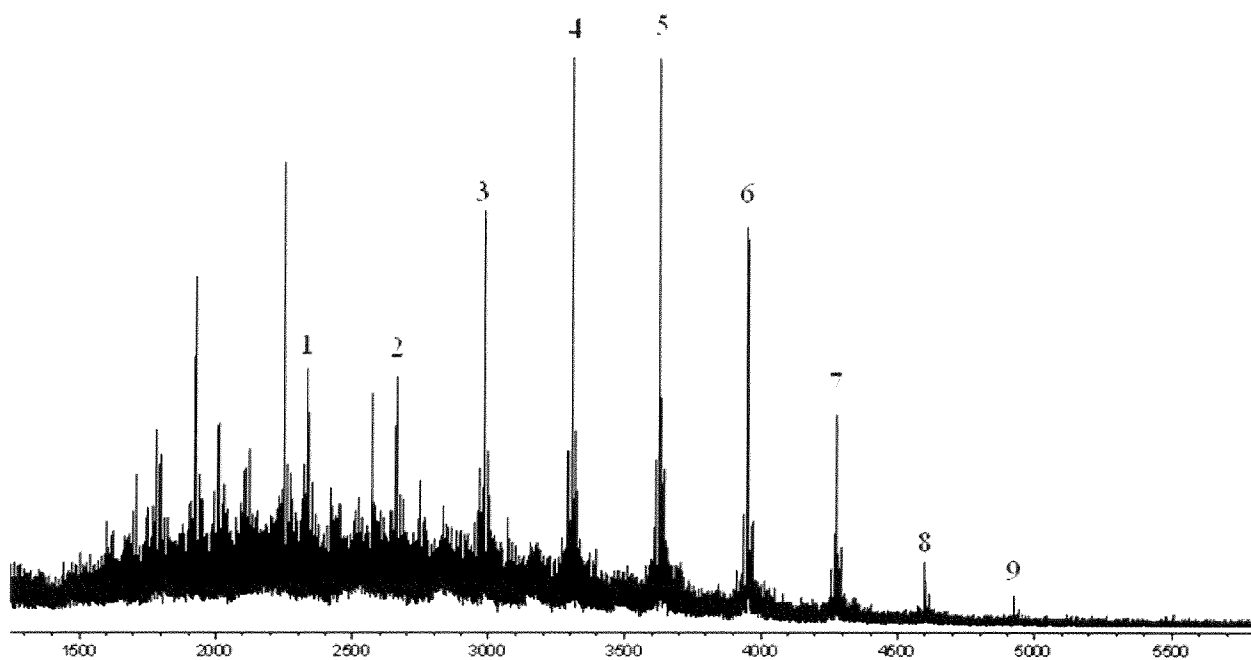

| Peak number | Number of side chains | Number of triazole rings | Number of MSH(4) ligands | Number of serinamide residues |
|-------------|-----------------------|--------------------------|--------------------------|-------------------------------|
| 1           | 2                     | 2                        | 0                        | 2                             |
| 2           | 3                     | 3                        | 0                        | 3                             |
| 3           | 4                     | 4                        | 0                        | 4                             |
| 4           | 5                     | 5                        | 0                        | 5                             |
| 5           | 6                     | 6                        | 0                        | 6                             |
| 6           | 7                     | 7                        | 0                        | 7                             |
| 7           | 8                     | 8                        | 0                        | 8                             |
| 8           | 9                     | 9                        | 0                        | 9                             |
| 9           | 10                    | 10                       | 0                        | 10                            |

**Figure S13.** MALDI-TOF of 16a.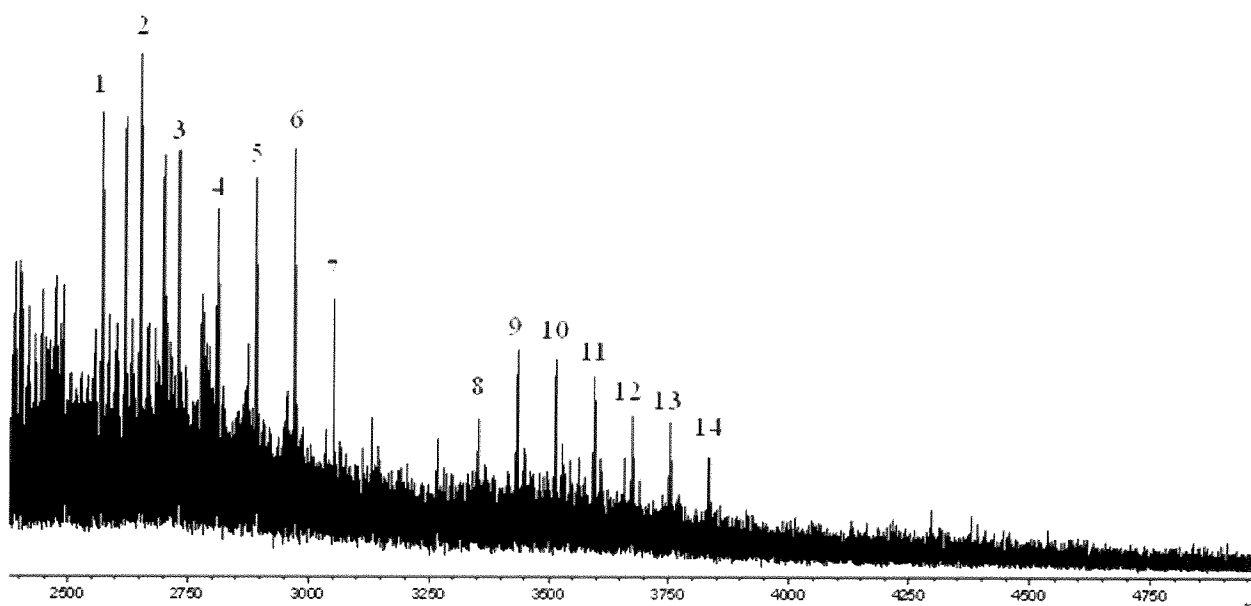

| Peak number | Number of side chains | Number of triazole rings | Number of MSH(4) ligands | Number of serinamide residues |
|-------------|-----------------------|--------------------------|--------------------------|-------------------------------|
| 1           | 2                     | 1                        | 1                        | 0                             |
| 2           | 3                     | 1                        | 1                        | 0                             |
| 3           | 4                     | 1                        | 1                        | 0                             |
| 4           | 5                     | 1                        | 1                        | 0                             |
| 5           | 6                     | 1                        | 1                        | 0                             |
| 6           | 7                     | 1                        | 1                        | 0                             |
| 7           | 8                     | 1                        | 1                        | 0                             |
| 8           | 2                     | 2                        | 2                        | 0                             |
| 9           | 3                     | 2                        | 2                        | 0                             |
| 10          | 4                     | 2                        | 2                        | 0                             |
| 11          | 5                     | 2                        | 2                        | 0                             |
| 12          | 6                     | 2                        | 2                        | 0                             |
| 13          | 7                     | 2                        | 2                        | 0                             |
| 14          | 8                     | 2                        | 2                        | 0                             |



**Figure S14.** MALDI-TOF of **16b**.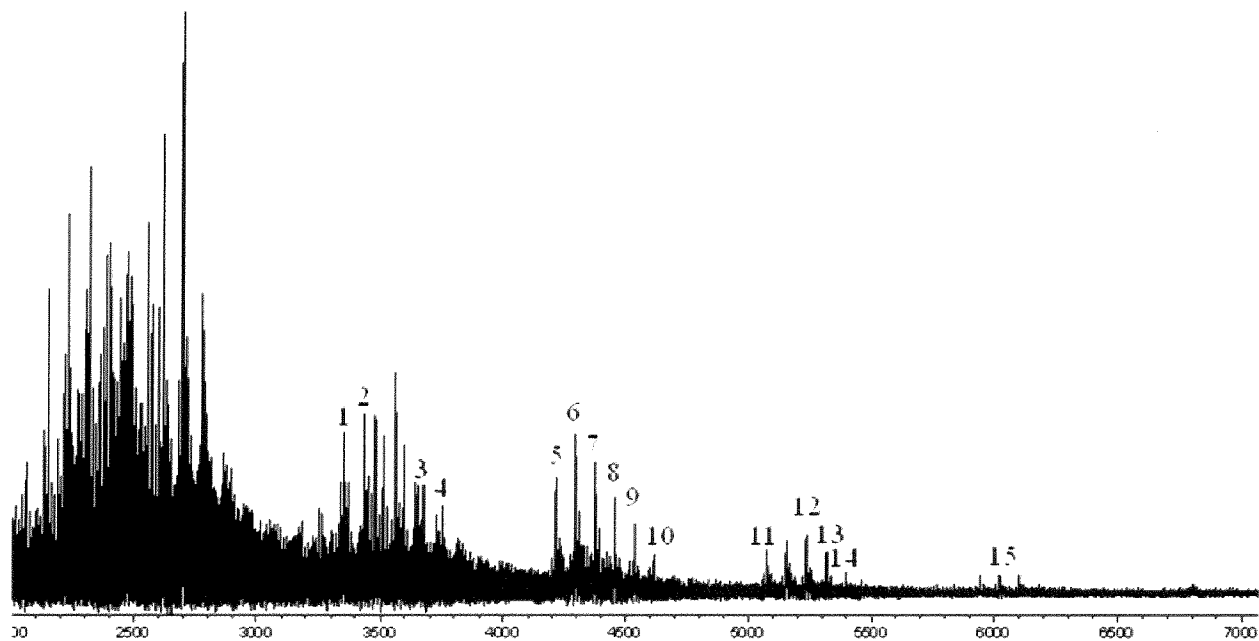

| Peak number | Number of side chains | Number of triazole rings | Number of MSH(4) ligands | Number of serinamide residues |
|-------------|-----------------------|--------------------------|--------------------------|-------------------------------|
| 1           | 2                     | 2                        | 2                        | 0                             |
| 2           | 3                     | 2                        | 2                        | 0                             |
| 3           | 6                     | 2                        | 2                        | 0                             |
| 4           | 7                     | 2                        | 2                        | 0                             |
| 5           | 3                     | 3                        | 3                        | 0                             |
| 6           | 4                     | 3                        | 3                        | 0                             |
| 7           | 5                     | 3                        | 3                        | 0                             |
| 8           | 6                     | 3                        | 3                        | 0                             |
| 9           | 7                     | 3                        | 3                        | 0                             |
| 10          | 8                     | 3                        | 3                        | 0                             |
| 11          | 4                     | 4                        | 4                        | 0                             |
| 12          | 6                     | 4                        | 4                        | 0                             |
| 13          | 7                     | 4                        | 4                        | 0                             |
| 14          | 8                     | 4                        | 4                        | 0                             |
| 15          | 6                     | 5                        | 5                        | 0                             |

Figure S15. MALDI-TOF of 16c.

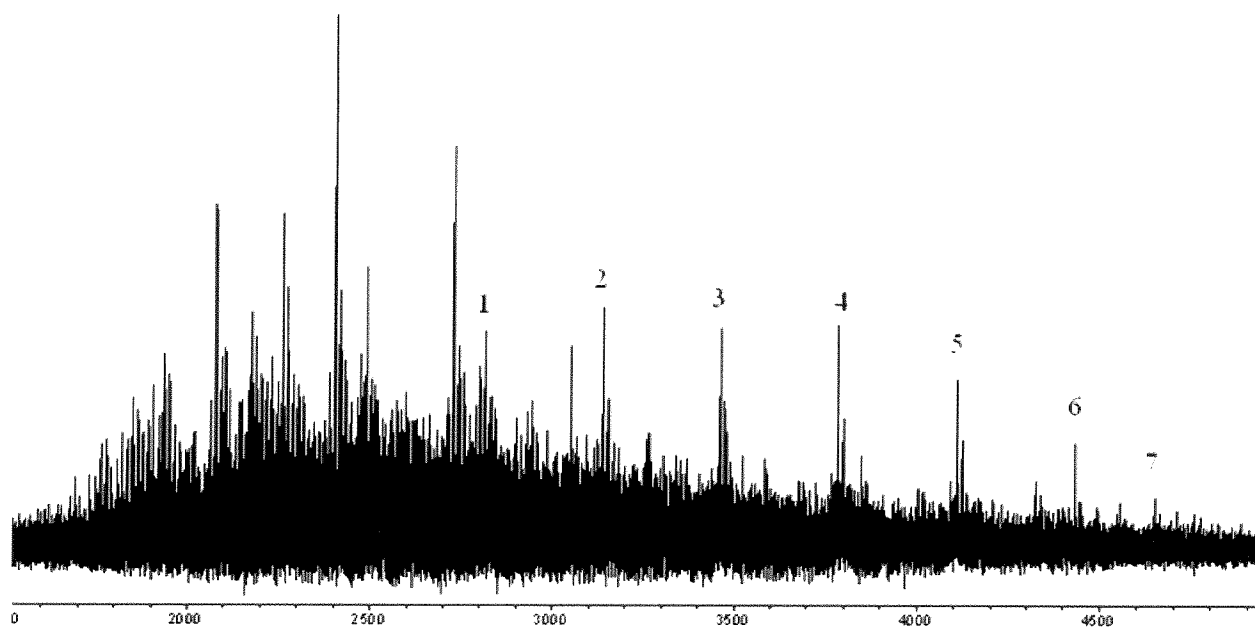

| Peak number | Number of side chains | Number of triazole rings | Number of MSH(4) ligands | Number of serinamide residues |
|-------------|-----------------------|--------------------------|--------------------------|-------------------------------|
| 1           | 2                     | 2                        | 1                        | 1                             |
| 2           | 3                     | 3                        | 1                        | 2                             |
| 3           | 4                     | 4                        | 1                        | 3                             |
| 4           | 5                     | 5                        | 1                        | 4                             |
| 5           | 6                     | 6                        | 1                        | 5                             |
| 6           | 7                     | 7                        | 1                        | 6                             |
| 7           | 6                     | 6                        | 2                        | 4                             |

**Figure S16.** MALDI-TOF of **16d**.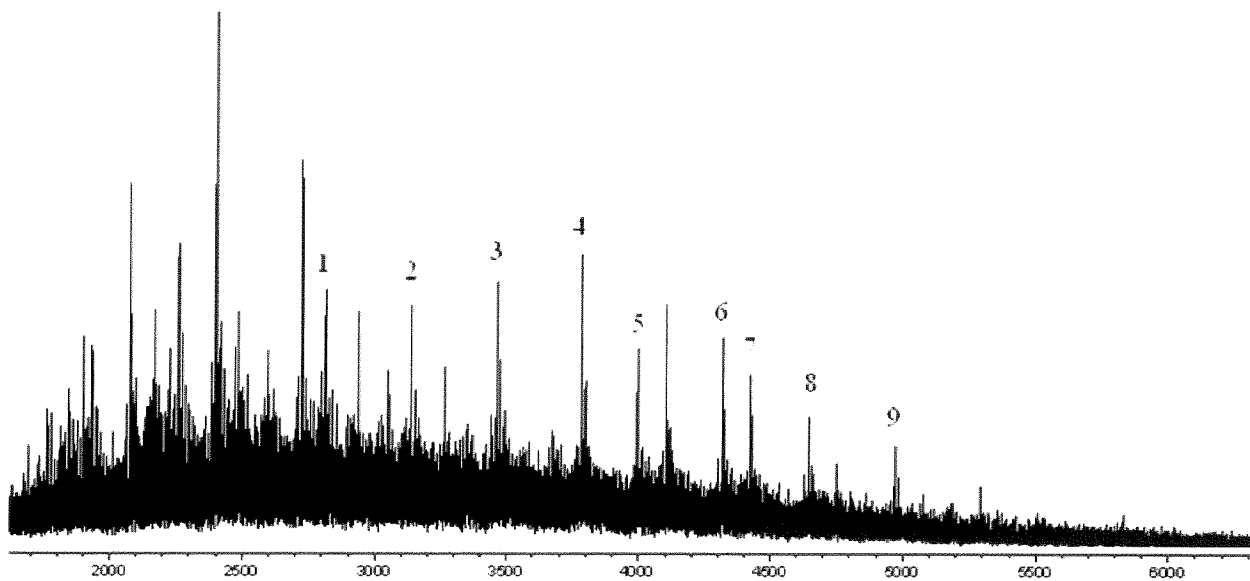

| Peak number | Number of side chains | Number of triazole rings | Number of MSH(4) ligands | Number of serinamide residues |
|-------------|-----------------------|--------------------------|--------------------------|-------------------------------|
| 1           | 2                     | 2                        | 1                        | 1                             |
| 2           | 3                     | 3                        | 1                        | 2                             |
| 3           | 4                     | 4                        | 1                        | 3                             |
| 4           | 5                     | 5                        | 1                        | 4                             |
| 5           | 4                     | 4                        | 2                        | 2                             |
| 6           | 5                     | 5                        | 2                        | 3                             |
| 7           | 7                     | 7                        | 1                        | 6                             |
| 8           | 6                     | 6                        | 2                        | 4                             |
| 9           | 7                     | 7                        | 2                        | 5                             |

Figure S17. MALDI-TOF of 16e.

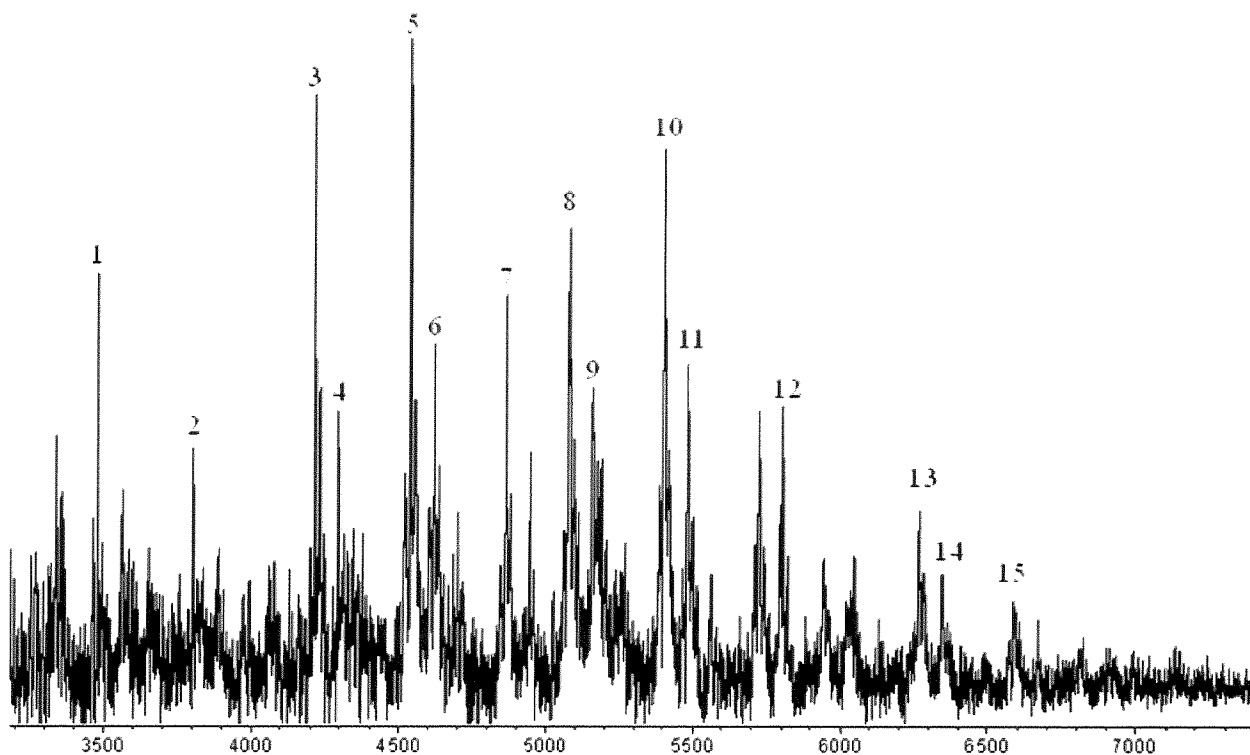

| Peak number | Number of side chains | Number of triazole rings | Number of MSH(4) ligands | Number of serinamide residues |
|-------------|-----------------------|--------------------------|--------------------------|-------------------------------|
| 1           | 4                     | 4                        | 1                        | 3                             |
| 2           | 5                     | 5                        | 1                        | 4                             |
| 3           | 3                     | 3                        | 3                        | 0                             |
| 4           | 4                     | 3                        | 3                        | 0                             |
| 5           | 4                     | 4                        | 3                        | 1                             |
| 6           | 5                     | 4                        | 3                        | 1                             |
| 7           | 5                     | 5                        | 3                        | 2                             |
| 8           | 4                     | 4                        | 4                        | 0                             |
| 9           | 5                     | 4                        | 4                        | 0                             |
| 10          | 5                     | 5                        | 4                        | 1                             |
| 11          | 6                     | 5                        | 4                        | 1                             |
| 12          | 7                     | 6                        | 4                        | 2                             |
| 13          | 6                     | 6                        | 5                        | 1                             |
| 14          | 7                     | 6                        | 5                        | 1                             |
| 15          | 7                     | 7                        | 5                        | 2                             |

## UV Studies

### MSH(4) (Ac-His-DPhe-Arg-Trp-NH<sub>2</sub>)

Solutions of Ac-MSH(4) (0.3, 0.2, 0.1, 0.08, 0.04 mM) were prepared in dry DMSO by dilution. A plot of concentration vs absorbance at  $\lambda_{\text{max}} = 282$  appears below.

| Concentration (mM) | Absorbance<br>( $\lambda_{\text{max}} = 282$ nm) |
|--------------------|--------------------------------------------------|
| 0.04               | 0.173                                            |
| 0.08               | 0.362                                            |
| 0.1                | 0.46                                             |
| 0.2                | 0.923                                            |
| 0.3                | 1.413                                            |

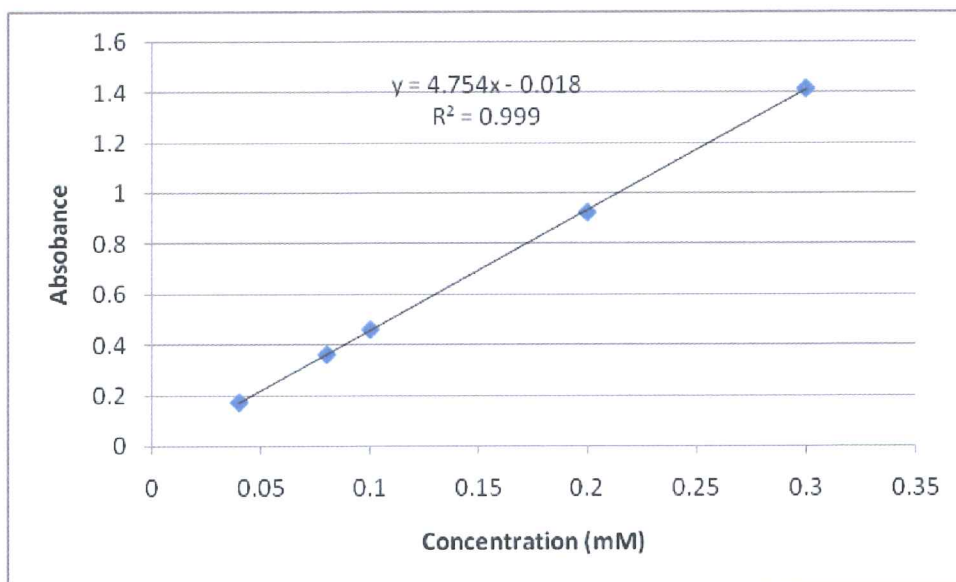

**MSH(4) derivative 14.**

Solutions of compound 14 (0.3, 0.2, 0.1, 0.05, 0.025 mM) were prepared in dry DMSO by dilution. The UV spectra of these solutions appear below.

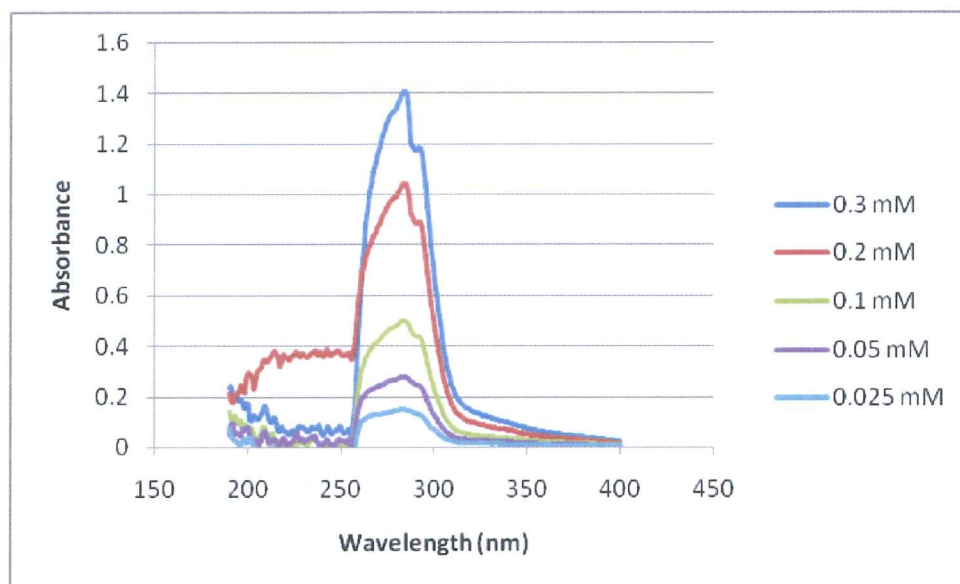

A plot of concentration vs absorbance at  $\lambda_{\max} = 282$  appears below.

| Concentration (mM) | Absorbance ( $\lambda_{\max} = 282$ nm) |
|--------------------|-----------------------------------------|
| 0.025              | 0.146                                   |
| 0.05               | 0.276                                   |
| 0.1                | 0.496                                   |
| 0.2                | 1.033                                   |
| 0.3                | 1.391                                   |

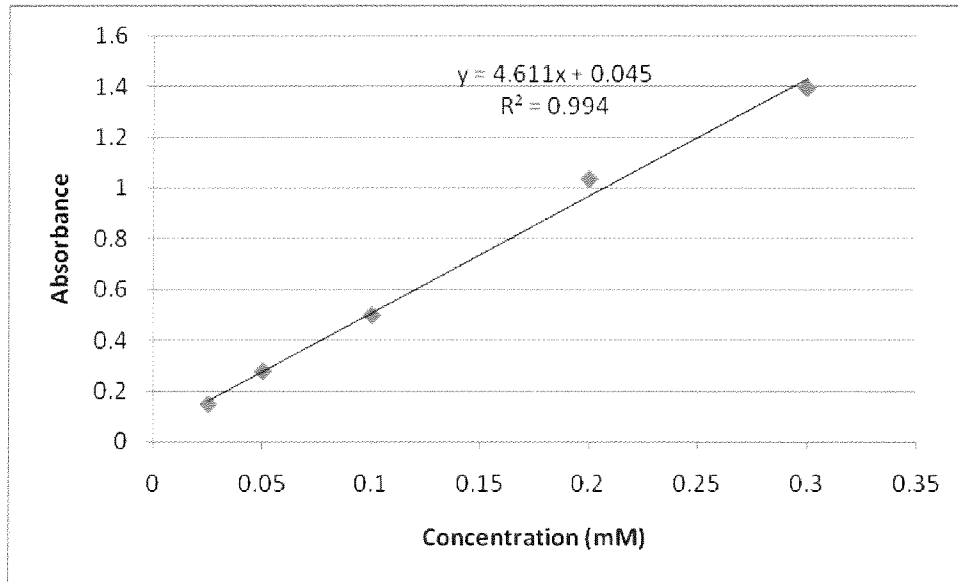

Supplement: NIHMS228435-supplement-1_si_001.pdf [file NIHMS228435-supplement-1_si_001.pdf]
